# Supplementary material for: Different responses of CO 2 , CH 4 , and N 2 O fluxes to seasonally asymmetric warming in an alpine grassland of Tianshan Mountains
Source: Copernicus journal article supplement (doi:10.5194/bg-2020-396), 2020-11-14
Supplement: Supplementary file 1 [file bg-2020-396-supplement.pdf]

1 **Different responses of CO<sub>2</sub>, CH<sub>4</sub>, and N<sub>2</sub>O fluxes to seasonally asymmetric**  
2 **warming in an alpine grassland of Tianshan Mountains**

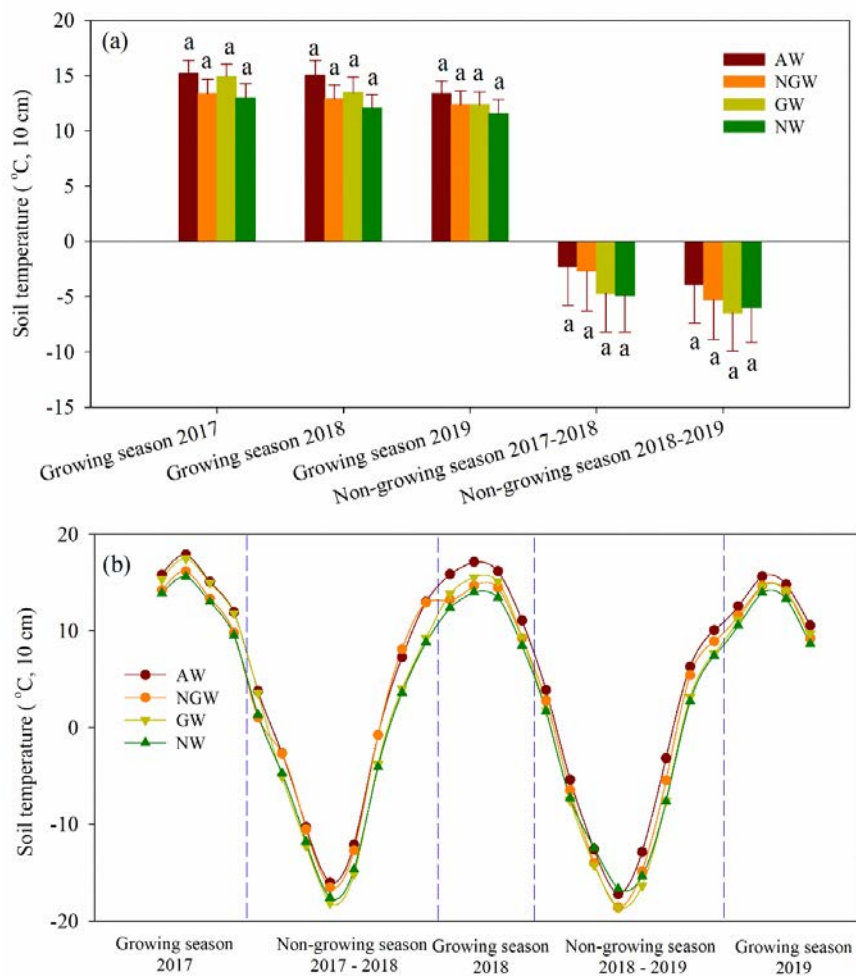

3  
4 **Figure S1 Variation in soil temperature (at 10-cm depth) under four treatments in**  
5 **alpine grassland from June 2017 to September 2019. AW, warming throughout the year;**  
6 **NGW, warming in nongrowing season only; GW, warming in growing season only; NW,**  
7 **non-warming. Significant differences among AW, NGW, GW and NW from analysis of**  
8 **variance (ANOVA) are denoted as bars within the same season with different lowercase**  
9 **letters,  $P < 0.05$ ; data points are the mean  $\pm$  standard error.**

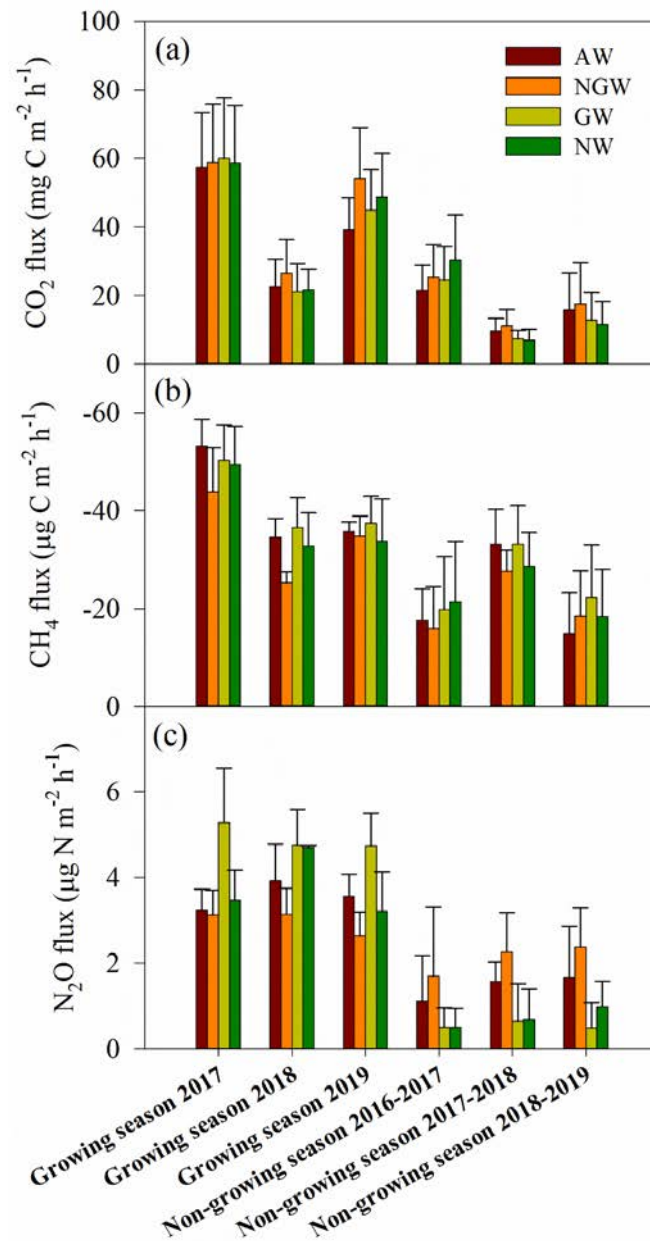

Figure S2 Variation in CO<sub>2</sub>, CH<sub>4</sub>, and N<sub>2</sub>O fluxes under four treatments in the growing season and nongrowing season from October 2016 to September 2019. AW, warming throughout the year; NGW, warming in the nongrowing season only; GW, warming in the growing season only; NW, non-warming. No significant differences among AW, NGW, GW, and NW were reported from ANOVA; data points are the mean  $\pm$  standard error

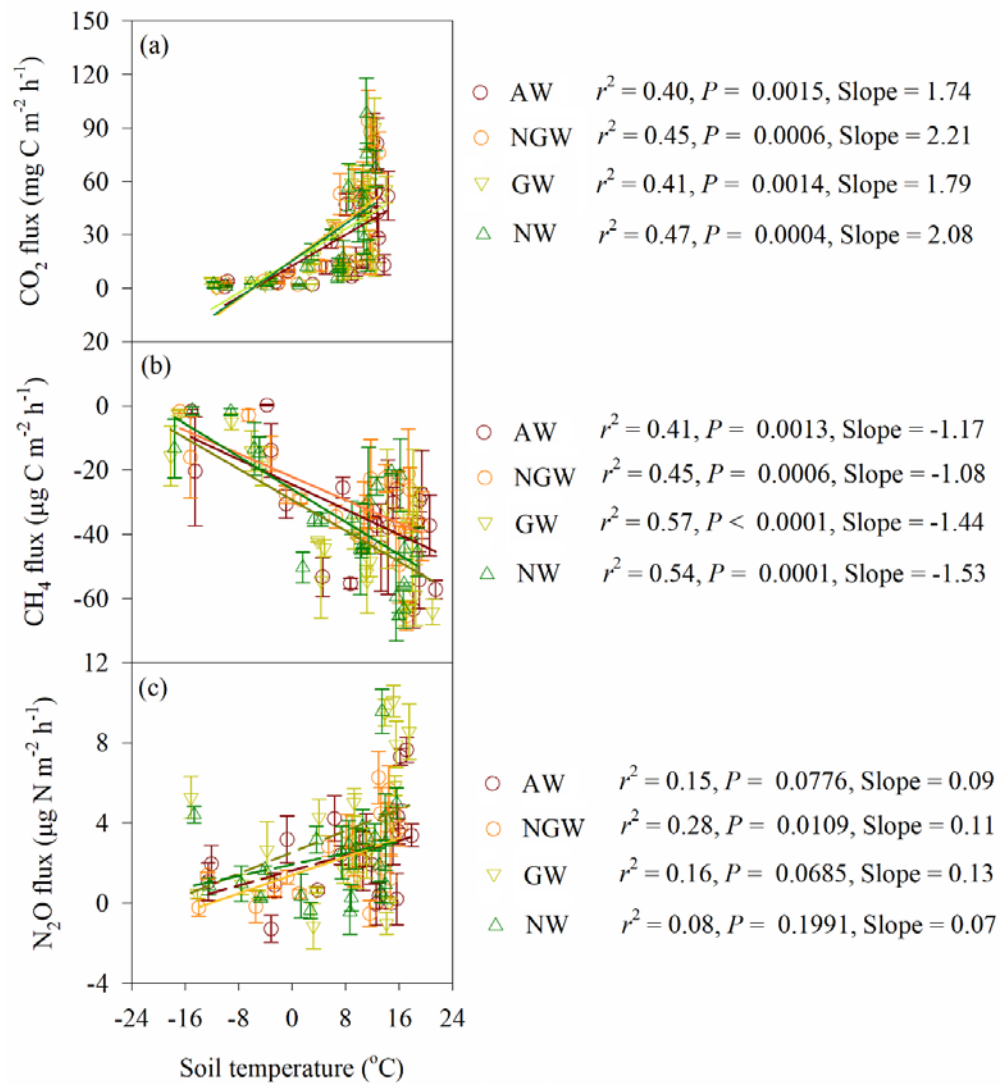

Figure S3 The relationship between  $\text{CO}_2$ ,  $\text{CH}_4$  and  $\text{N}_2\text{O}$  fluxes and soil temperature (at 10-cm depth) from October 2016 to September 2019. AW, warming throughout the year; NGW, warming in the nongrowing season only; GW, warming in the growing season only; NW, non-warming.
